# Supplementary material
Source: PubMed Central journal article supplement (PMC5976527)
Supplement: NIHMS956254-supplement-1.pdf [file NIHMS956254-supplement-1.pdf]

| Active patients |                |              |
|-----------------|----------------|--------------|
| Sex             | Classification | Total Sledai |
| F               | ALN            | 12           |
| M               | ALN            | 4            |
| F               | ANLN           | 8            |
| F               | ALN            | 16           |
| F               | ALN            | 10           |
| F               | ALN            | 14           |
| M               | ANLN           | 8            |
| F               | ALN            | 8            |
| F               | ANLN           | 8            |
| F               | ALN            | 16           |
| F               | ALN            | 8            |
| M               | ALN            | 6            |
| F               | ANLN           | 10           |
| F               | ANLN           | 10           |
| F               | ANLN           | 8            |
| F               | ALN            | 14           |
| F               | ALN            | 8            |
| F               | ALN            | 12           |
| F               | ANLN           | 7            |
| M               | ANLN           | 15           |
| F               | ALN            | 12           |
| F               | ALN            | 16           |
| F               | ALN            | 20           |
| F               | ALN            | 17           |
| F               | ALN            | 24           |
| F               | ALN            | 7            |
| F               | ANLN           | 15           |
| F               | ALN            | 24           |
| F               | ALN            | 32           |
| F               | ALN            | 20           |
| F               | ANLN           | 15           |
| M               | ANLN           | 8            |
| F               | ALN            | 10           |
| M               | ALN            | 22           |
| F               | ALN            | 6            |
| M               | ALN            | 17           |
| M               | ALN            | 20           |
| F               | ALN            | 18           |
| F               | ALN            | 4            |
| M               | ANLN           | 9            |
| F               | ANLN           | 8            |
| M               | ALN            | 22           |
| F               | ALN            | 6            |
| F               | ALN            | 20           |
| F               | ALN            | 5            |
| F               | ALN            | 6            |
| F               | ALN            | 18           |
| F               | ALN            | 6            |
| F               | ALN            | 10           |

**Supplementary Table 1.**  
 Characteristics of SLE patients  
 with active disease.

ALN- active SLE patients with  
 nephritis, ANLN- active SLE  
 patients with no history of  
 nephritis

**Supplementary Table 2.** Characteristics of SLE patients with quiescent disease.

| Remission patients |                |              |
|--------------------|----------------|--------------|
| Sex                | Classification | Total Sledai |
| F                  | RNLN           | 0            |
| F                  | RLN            | 0            |
| F                  | RLN            | 2            |
| F                  | RLN            | 2            |
| F                  | RLN            | 0            |
| F                  | RLN            | 4            |
| F                  | RLN            | 4            |
| F                  | RNLN           | 2            |
| F                  | RLN            | 0            |
| F                  | RLN            | 4            |
| F                  | RLN            | 0            |
| F                  | RLN            | 4            |
| F                  | RLN            | 0            |
| F                  | RLN            | 2            |
| F                  | RLN            | 2            |
| F                  | RLN            | 0            |
| F                  | RLN            | 4            |
| F                  | RLN            | 4            |
| M                  | RLN            | 0            |
| F                  | RLN            | 0            |
| F                  | RLN            | 2            |
| M                  | RLN            | 4            |
| F                  | RLN            | 0            |
| F                  | RLN            | 2            |

RLN- patients in remission with a history of nephritis, RNLN- Patients in remission with no history of nephritis

**Supplementary Table 3.** Characteristics of healthy controls.

| <b>Healthy Controls</b> |            |
|-------------------------|------------|
| <b>Age</b>              | <b>Sex</b> |
| 24                      | F          |
| 26                      | M          |
| 24                      | F          |
| 23                      | F          |
| 27                      | F          |
| 23                      | M          |
| 26                      | M          |
| 39                      | F          |
| 25                      | F          |
| 24                      | M          |
| 26                      | F          |
| 37                      | F          |
| 50                      | F          |
| 28                      | F          |
| 29                      | M          |
| 25                      | M          |
| 35                      | M          |
| 57                      | F          |
| 57                      | F          |
| 23                      | M          |

**Supplementary Table 4.**  
 Characteristics of SLE patient  
 samples collected for FACS  
 sorting.

| Sex | Disease Duration (years) | Total SLEDAI |
|-----|--------------------------|--------------|
| F   | 10                       | 12           |
| F   | 3                        | 6            |
| M   | 12                       | 4            |
| F   | 0.5                      | 12           |
| M   | 9                        | 8            |
| F   | 7                        | 6            |
| F   | 33                       | 4            |
| F   | 0.67                     | 6            |
| F   | 1                        | 8            |
| F   | 7                        | 12           |
| F   | 1                        | 4            |
| F   | 12                       | 6            |
| F   | 3                        | 13           |
| F   | 0                        | 12           |
| F   | 0.67                     | 10           |
| F   | 14                       | 6            |
| F   | 21                       | 6            |
| F   | 38                       | 4            |
| F   | 21                       | 6            |
| F   | 15                       | 8            |

**Supplementary Table 5.**  
Characteristics of healthy control  
samples collected for FACS  
sorting.

| Age | Gender |
|-----|--------|
| 28  | F      |
| 27  | F      |
| 39  | F      |
| 28  | M      |
| 38  | F      |
| 21  | F      |
| 22  | F      |
| 24  | F      |
| 38  | F      |
| 20  | F      |
| 28  | M      |

**Supplementary Table 6**

| sqPCR primer pairs Mouse |                            |                           |
|--------------------------|----------------------------|---------------------------|
| Primer Name              | Forward                    | Reverse                   |
| Actb                     | AAGAGCTATGAGCTGCCTGA       | TACGGATGTCAACGTCACAC      |
| Cyp1a1                   | CAATGAGTTTGGGGAGGTTACTG    | CCCTTCTCAAATGTCCTGTAGTG   |
| Cyp1b1                   | CCACCAGCCTTAGTGCAGAC       | GGCCAGGACGGAGAAGAGT       |
| Il10                     | ATTTTAATAAGCTCCAAGACCAAGGT | CTGCAGGTGTTTTAGCTTTTCATTT |
| Tgf $\beta$ 1            | TGGAGCAACATGTGGAACTC       | CAGCAGCCGGTTACCAAG        |
| Il6                      | AGACAAAGCCAGAGTCCTTCAGAGA  | GCCACTCCTTCTGTGACTCCAGC   |
| Il12p40                  | AACTTGAGGGAGAAGTAGGAATGG   | GGAAGCACGGCAGCAGAATA      |
| TNF $\alpha$             | TTGAGATCCATGCCGTTGG        | ATCATCTTCTCAAATTCGAGTGA   |
| Il1 $\beta$              | TGTAATGAAAGACGGCACACC      | TCTTCTTTGGGTATTGCTTGG     |
| Ido1                     | TGGCAAACCTGGAAGAAAAAG      | AATGCTTTCAGGTCTTGACG      |
| Hmox1                    | AGCAGAACCCAGTCTATGCCCCA    | TGCCAGTGAGGCCCATACCGAA    |

**Supplementary Table 7**

| sqPCR primer pairs Human |                             |                         |
|--------------------------|-----------------------------|-------------------------|
| Primer Name              | Forward                     | Reverse                 |
| ACTB                     | AGAGCTACGAGCTGCCTGAC        | AGCACTGTGTTGGCGTACAG    |
| AHR                      | ATTGTGCCGAGTCCCATATC        | AAGCAGGCGTGCATTAGACT    |
| CYP1A1                   | CTTGGACCTCTTTGGAGCT         | GACCTGCCAATCACTGTG      |
| CYP1B1                   | GACGCCTTTATCCTCTCTGCG       | ACGACCTGATCCAATTCTGCC   |
| IFNA1                    | CTTCAACCTCTTTACCACAAAAGATTC | TGCTGGTAGAGTTCGGTGCA    |
| IFNA2                    | CTTGAAGGACAGACATGACTTTGGA   | GGATGGTTTCAGCCTTTTGGGA  |
| IFNB1                    | ATGACCAACAAGTGTCTCCTCC      | GGAATCCAAGCAAGTTGTAGCTC |
| IFNG                     | TCGGTAACTGACTTGAATGTCCA     | TCCTTTTTCGCTTCCCTGTTTT  |
| IL10                     | GACTTTAAGGTTACCTGGGTTG      | TCACATGCGCCTTGATGTCTG   |
| IL6                      | AAATTCGGTACATCCTCGACGG      | GGAAGTTTCAGGTTGTTTTCTGC |
| TGFB1                    | GGCCAGATCCTGTCCAAGC         | GTGGGTTTCCACCATTAGCAC   |
| TNF                      | TCAGATCATCTTCTCGAACCCC      | ATCTCTCAGCTCCACGCCAT    |

## Supplementary Table 8

| ChIP sqPCR primers |                             |                             |
|--------------------|-----------------------------|-----------------------------|
| Primer Name        | Forward                     | Reverse                     |
| Actb               | GCTGTGGTGGTGAAGCTGTA        | CACACTGTGCCCATCTACGA        |
| Cyp1a1             | AGGCTCTTCTCACGCAACTC        | CTGGGGCTACAAAGGGTGAT        |
| Cyp1b1             | CAGCACTGCCACCAATTCTC        | CTGGCGTTCGGTCACTACTC        |
| Ereg               | TCCCACCCTTGTATCCCTGAT       | CACACACACACACACACACA        |
| Il10               | GGTGACTTCCGAGTCAGCAA        | ACAGCTATTTTTAGTATGGGCTACC   |
| Il6                | CGATGCTAAACGACGTCACATTGTGCA | CTCCAGAGCAGAATGAGCTACAGACAT |
| IL12p40            | ACCGAAGTCCAATGCAAAGG        | GGAACACATGCCCACTTGCT        |
| Arg1               | TAGTGTCTCCTGGGCATCCT        | ACGGGCTTCTGAGGGATTTG        |
| Tgf $\beta$ 1      | CCTCACCTTTATTAGCACACA       | AGCTGTTCCTACTGGGAGTTAGC     |
| Ccl2               | CCTCAGAGCAGCCAGAAGTG        | GCATGGTGGTGGAGGAAGAG        |
| Ccl7               | CAAGGCCAGCACAGAGTCT         | ACAGAAGCGTGGCAGAGATC        |
| Cxcl5              | TTCCCCAGCATCTTCAAGCT        | GGAGGAGGTGTGGAGATTGG        |
| Tnf                | CGATCACCCCGAAGTTCAGT        | GACGTGGAAGTGGCAGAAGA        |
